# Supplementary material for: Benthic Invertebrates Abundance and Trophic Links in the Coastal Zone during Cladophora Blooms
Source: MDPI journal article supplement (doi:10.3390/d14121053), 2022-12-01

**Supplementary Table S1.** Spearman correlation coefficient between variables of biota and environmental factors. Significant correlations at  $p < 0.05$  are marked by red. C is organic carbon in sediment, Am is survival rate of amphipods, S1 and S2 mean surface and bottom water salinity, O1 and O2 mean surface and bottom oxygen in water, P is total phosphorus, Ma is biomass of macroinvertebrates, NMe and BMe mean abundance and biomass of meiobenthos.

|     | C     | Am    | S1    | S2    | O1    | O2    | P     | Cla   | Ma    | NMe   | BMe   |
|-----|-------|-------|-------|-------|-------|-------|-------|-------|-------|-------|-------|
| C   | 1.00  | -0.29 | -0.52 | -0.52 | 0.06  | 0.02  | 0.23  | -0.70 | -0.80 | -0.19 | -0.13 |
| Am  | -0.29 | 1.00  | 0.08  | 0.08  | 0.18  | 0.17  | -0.80 | 0.03  | -0.07 | 0.01  | -0.16 |
| S1  | -0.52 | 0.08  | 1.00  | 1.00  | 0.72  | 0.78  | -0.14 | 0.63  | 0.67  | 0.04  | -0.10 |
| S2  | -0.52 | 0.08  | 1.00  | 1.00  | 0.72  | 0.78  | -0.14 | 0.63  | 0.67  | 0.04  | -0.10 |
| O1  | 0.06  | 0.18  | 0.72  | 0.72  | 1.00  | 0.95  | -0.29 | 0.02  | 0.13  | -0.41 | -0.56 |
| O2  | 0.02  | 0.17  | 0.78  | 0.78  | 0.95  | 1.00  | -0.31 | 0.08  | 0.18  | -0.22 | -0.44 |
| P   | 0.23  | -0.80 | -0.14 | -0.14 | -0.29 | -0.31 | 1.00  | 0.14  | 0.16  | 0.27  | 0.46  |
| Cla | -0.70 | 0.03  | 0.63  | 0.63  | 0.02  | 0.08  | 0.14  | 1.00  | 0.79  | 0.59  | 0.61  |
| Ma  | -0.80 | -0.07 | 0.67  | 0.67  | 0.13  | 0.18  | 0.16  | 0.79  | 1.00  | 0.39  | 0.29  |
| NMe | -0.19 | 0.01  | 0.04  | 0.04  | -0.41 | -0.22 | 0.27  | 0.59  | 0.39  | 1.00  | 0.92  |
| BMe | -0.13 | -0.16 | -0.10 | -0.10 | -0.56 | -0.44 | 0.46  | 0.61  | 0.29  | 0.92  | 1.00  |

**Supplementary Table S2.** List of benthic species and functional groups at study sites.

\* Neva Bay includes sites 6 and 7, \*\*Northern coast of the estuary sites 1-5 and \*\*\*Southern coast of the estuary sites 8-10. Functional groups: grazers (Gr), detritophagous (D), suspension and deposit-feeder (S), omnivores (Om), predaceous (Pr). Size group (SG): meiofauna (Me) and macrofauna (Ma).

| Species                                             | FG   | SG | Neva Bay* | Northern estuary** | Southern estuary*** |
|-----------------------------------------------------|------|----|-----------|--------------------|---------------------|
| <b>Nematoda</b>                                     |      |    |           |                    |                     |
| <i>Brevitobrilus stephanskii</i> (Micoletzky) Tsal. | D    | Me | +         | +                  | +                   |
| <i>Chromadorita leucarti</i> (de Man)               | D    | Me | +         | +                  | +                   |
| <i>Daptonema setosa</i> de Man                      | D    | Me |           | +                  | +                   |
| <i>Dorylaimus stagnalis</i> Duyjarden               | D, S | Me | +         | +                  | +                   |
| <i>Epitobrilus medius</i> (G. Schneider) Tsal.      | D    | Me | +         | +                  | +                   |
| <i>Ethmolaimus pratensis</i> de Man                 | D    | Me | +         | +                  | +                   |
| <i>Mononchus truncates</i> Bast                     | D    | Me | +         | +                  | +                   |
| <i>Neotobrilus longus</i> (Leidy)                   | D    | Me | +         | +                  | +                   |
| <i>Plectus</i> spp.                                 | D, S | Me | +         | +                  | +                   |
| <i>Pseudjincholaimus</i> sp.                        | D    | Me |           | +                  |                     |
| <i>Raritobrilus steineri</i> (Steiner)              | D, S | Me | +         | +                  | +                   |
| <i>Tobrilus gracilis</i> (Bast)                     | D, S | Me |           | +                  | +                   |
| <i>Tripyla glomerans</i> Bastian                    | S, P | Me | +         | +                  | +                   |
| <b>Harpacticoida</b>                                |      |    |           |                    |                     |
| <i>Canthocamhtus staphylinus</i> Yurine             | D    | Me | +         | +                  | +                   |
| <b>Oligochaeta</b>                                  |      |    |           |                    |                     |
| <i>Stylaria lacustris</i> (L)                       | D    | Me | +         | +                  | +                   |
| <i>Nais</i> spp                                     | D    | Me | +         | +                  | +                   |
| <i>Paranais</i> spp.                                | D    | Me | +         |                    |                     |
| <i>Amphicyaeta</i> spp.                             | D    | Me | +         |                    |                     |
| <i>Uncinais uncinata</i> (Oersted)                  | D    | Me | +         | +                  | +                   |
| <i>Chaetogaster</i> spp.                            | D    | Me | +         | +                  | +                   |
| <i>Pristina</i> spp.                                | D    | Me | +         | +                  | +                   |
| <i>Pristinella bilobata</i> (Bretscher)             | D    | Me | +         |                    |                     |
| <i>Lumbricillus lineatus</i> (Muller)               | D    | Ma | +         | +                  | +                   |
| <i>Enchytraeidae</i> genus sp.                      | D    | Me | +         |                    |                     |
| <i>Tubifex tubifex</i> (Muller)                     | D    | Ma | +         | +                  | +                   |
| <i>Spirosperma ferox</i> Eisen                      | D    | Ma | +         | +                  | +                   |
| <i>Limnodrilus</i> spp.                             | D    | Ma | +         | +                  | +                   |

|                                                                                                     |      |        |   |   |   |
|-----------------------------------------------------------------------------------------------------|------|--------|---|---|---|
| <i>(L.claparedeanus</i> Ratzel, <i>L. hoffmeisteri</i> Claparede, <i>L. profundicula</i> (Verrill)) |      |        |   |   |   |
| <b>Hirudinea</b>                                                                                    |      |        |   |   |   |
| <i>Erpobdella octoculata</i> (L)                                                                    | Om   | Ma     | + | + | + |
| <i>Glossiphonia complanata</i>                                                                      | Om   | Ma     | + | + | + |
| <b>Amphipoda</b>                                                                                    |      |        |   |   |   |
| <i>Gmelinoides fasciatus</i> (Stebbing)                                                             | D    | Maa    | + | + | + |
| <i>Pontogammarus robustoides</i> (Sars)                                                             | D, P | Ma     | + | + | + |
| <i>Gammarus tigrinus</i> Sexton                                                                     | D,P  | Ma     |   | + | + |
| <i>Gammarus zaddachi</i> Sexton                                                                     | Om   | Ma     |   | + | + |
| <b>Isopoda</b>                                                                                      |      |        |   |   |   |
| <i>Asellus aquaticus</i> (L)                                                                        | D    | Ma     | + | + | + |
| <b>Bivalvia</b>                                                                                     |      |        |   |   |   |
| <i>Dreissena polymorpha</i> Pallas                                                                  | D, S | Ma     | + | + | + |
| <i>Pisidium inflatum</i> (Muehlfeld in Poro)                                                        | S    | Ma     |   |   |   |
| <i>Sphaerium corneum</i> (L)                                                                        | S    | Ma     |   |   |   |
| <i>Anadonta anatina</i> (L)                                                                         | S    | Ma     |   |   |   |
| <b>Gastropoda</b>                                                                                   |      |        |   |   |   |
| <i>Bythinia tentaculata</i> (L)                                                                     | G    | Ma     | + | + | + |
| <i>Theodoxus fluviatilis</i> (L)                                                                    | G    | Ma     |   | + | + |
| <i>Radix balthica</i> (L)                                                                           | G    | Ma     | + | + | + |
| <i>Viviparus viviparus</i> (L)                                                                      | G    | Ma     | + |   |   |
| <b>Ephemeroptera</b>                                                                                |      |        |   |   |   |
| <i>Caenis undosa</i> Tiensuu                                                                        | G,D  | Ma     | + | + | + |
| <i>Heptagenia sulphurea</i> (Müller)                                                                | G,D  | Ma     |   | + | + |
| <i>Siphonurus lacustris</i> (Eaton)                                                                 | G,D  | Ma     | + |   |   |
| <i>Ephemerella ignita</i> Poda                                                                      | G,D  | Ma     | + |   |   |
| <b>Trichoptera</b>                                                                                  |      |        |   |   |   |
| <i>Agraylea multipunctata</i> Curt                                                                  | G,D  | Ma     | + | + | + |
| <i>Athripsodes cinereus</i> Curt                                                                    | G,D  | Ma     | + | + |   |
| <i>Hydropsyche contubernalis</i> MacLachlan                                                         | Om   | Ma     | + | + | + |
| <i>Limnephilus</i> sp.                                                                              | Om   | Ma     | + |   |   |
| <b>Chironominae</b>                                                                                 |      |        |   |   |   |
| <i>Tanytarsus</i> spp.                                                                              | D    | Me     | + | + | + |
| <i>Cladotanytarsus</i> gr. <i>mancus</i>                                                            | D    | Me     | + | + | + |
| <i>Cryptochironomus</i> gr. <i>defectus</i>                                                         | D    | Me     | + | + | + |
| <i>Glyptotendipes</i> spp.                                                                          | G, D | Ma     | + | + | + |
| <i>Cricotopus</i> spp.                                                                              | D    | Me, Ma | + | + | + |

|                                               |          |           |   |   |   |
|-----------------------------------------------|----------|-----------|---|---|---|
| <i>Microtendipes</i> gr. <i>pedellus</i>      | <b>D</b> | Me,<br>Ma | + | + | + |
| <i>Paratanytarsus austriacus</i><br>(Kieffer) | <b>D</b> | Me        | + | + | + |
| <i>Chironomus</i> sp.                         | <b>D</b> | Ma        | + | + | + |
| <i>Polypedilum</i> spp                        | <b>D</b> | Ma        | + | + | + |
| <i>Psectrocladius</i> spp.                    | <b>D</b> | Ma        | + | + | + |

**Supplementary Table S3.** Biomass of various groups of benthic invertebrates g WW/ m<sup>2</sup> and the total biomass of meio- and macrobenthos at study sites.

| Taxon        | Site |      |      |      |      |       |       |       |      |       |
|--------------|------|------|------|------|------|-------|-------|-------|------|-------|
|              | 1    | 2    | 3    | 4    | 5    | 6     | 7     | 8     | 9    | 10    |
| Nematoda     | 0.02 | 0.01 | 0.1  | 0.01 | 0.01 | 0.002 | 0.006 | 0.001 | 0.01 | 0     |
| Meiobenthos  | 0.43 | 0.76 | 0.74 | 0.29 | 0.29 | 0.03  | 0.01  | 0.3   | 0.24 | 0.01  |
| Insecta      | 3.60 | 2.87 | 2.55 | 3.46 | 0.16 | 3.75  | 1.64  | 5.12  | 3.05 | 2.65  |
| Mollusca     | 15.6 | 3    | 5.5  | 9    | 0.35 | 8.8   | 4.55  | 0     | 16.8 | 3.42  |
| Crustaceans  | 4.4  | 4.8  | 2.5  | 2.25 | 5.74 | 0     | 1.96  | 0     | 2.8  | 17.86 |
| others       | 1.1  | 5.76 | 2.5  | 1.5  | 4.92 | 0     | 0     | 0     | 0.2  | 2.82  |
| Macrobenthos | 24.7 | 9.57 | 4.64 | 5.76 | 3.2  | 4.26  | 2.52  | 5.82  | 5.09 | 29.4  |

**Supplementary Table S4.** *p*-values after Mann-Whitney pairwise comparisons for consumers, Bonferroni corrected. Biv is bivalvia, Gast – gastropoda, Trich –Trichoptera, Eph – ephemeroptera, Hir – hirudinea, Gam – gammaridae.

| Consumers  |            |        |       |        |        |         |        |         |
|------------|------------|--------|-------|--------|--------|---------|--------|---------|
| Carbon     | <b>Biv</b> | Gast   | Trich | Dipt   | Eph    | Hir     | Gam    | Fish    |
| <b>Biv</b> | 0          | 0.0161 | 0.005 | 0.0047 | 0.0050 | 0.0047  | 0.0050 | 0.0049  |
| Gast       | 0.451      | 0      | 0.575 | 0.935  | 0.936  | 0.935   | 0.936  | 0.936   |
| Trich      | 0.142      | 1      | 0     | 0.935  | 0.688  | 0.375   | 0.748  | 0.173   |
| Dipt       | 0.134      | 1      | 1     | 0      | 0.936  | 0.935   | 0.518  | 0.936   |
| Eph        | 0.142      | 1      | 1     | 1      | 0      | 0.809   | 0.471  | 0.422   |
| Hir        | 0.134      | 1      | 1     | 1      | 1      | 0       | 0.567  | 0.169   |
| Gam        | 0.142      | 1      | 1     | 1      | 1      | 1       | 0      | 0.172   |
| Fish       | 0.14       | 1      | 1     | 1      | 1      | 1       | 1      | 0       |
| Nitrogen   | <b>Biv</b> | Gast   | Trich | Dipt   | Eph    | Hir     | Gam    | Fish    |
| <b>Biv</b> | 0.0        | 0.030  | 0.936 | 0.0237 | 0.0102 | 0.0049  | 0.0127 | 0.00505 |
| Gast       | 0.842      | 0.0    | 0.421 | 0.0047 | 0.0051 | 0.00499 | 0.0051 | 0.0051  |
| Trich      | 1.0        | 1.0    | 0.0   | 0.935  | 0.228  | 0.00498 | 0.689  | 0.0051  |

|      |       |       |       |       |       |        |       |        |
|------|-------|-------|-------|-------|-------|--------|-------|--------|
| Dipt | 0.664 | 0.134 | 1.0   | 0.0   | 0.106 | 0.0047 | 0.935 | 0.0048 |
| Eph  | 0.288 | 0.142 | 1.0   | 1.0   | 0.0   | 0.0049 | 0.228 | 0.0051 |
| Hir  | 0.140 | 0.14  | 0.14  | 0.13  | 0.14  | 0.0    | 0.004 | 0.053  |
| Gam  | 0.357 | 0.14  | 1.0   | 1.0   | 1.0   | 0.14   | 0.0   | 0.0051 |
| Fish | 0.142 | 0.142 | 0.142 | 0.134 | 0.142 | 1.0    | 0.142 | 0.0    |

**Supplementary Figure S1.** Coastal zone of the Neva estuary during macroalgae bloom.

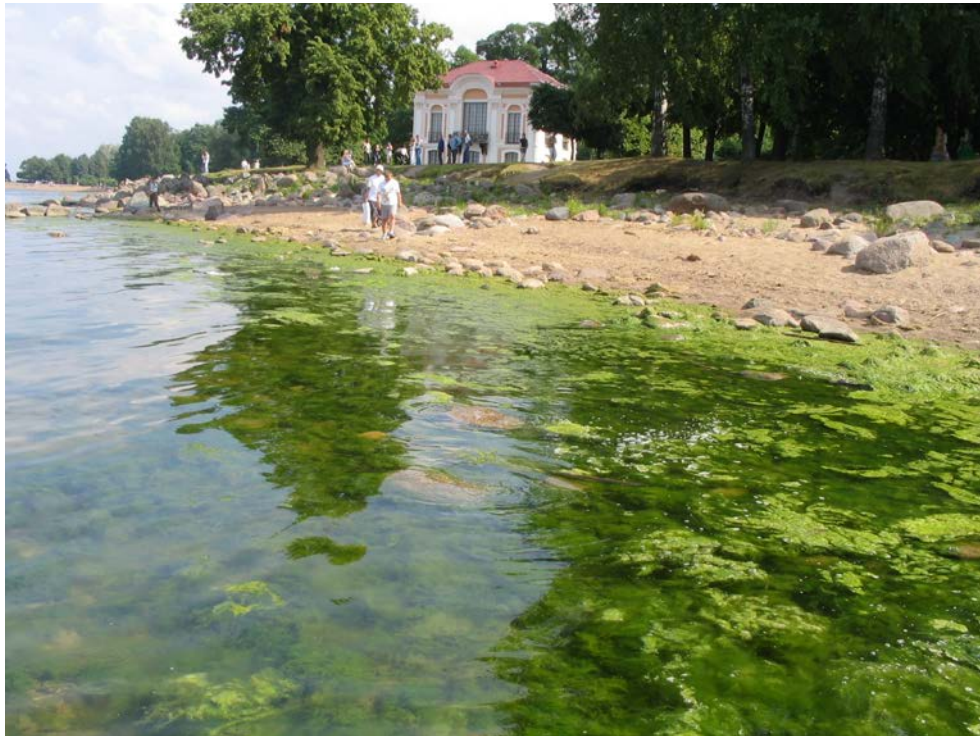

Supplement: s1 [file s1]
